# Supplementary material
Source: publisher site journal article supplement (https://www.dovepress.com/article/176152)
Supplement: Supplementary file 1 [file get_supplementary_file.php]

Supplementary Figures

Figure S1

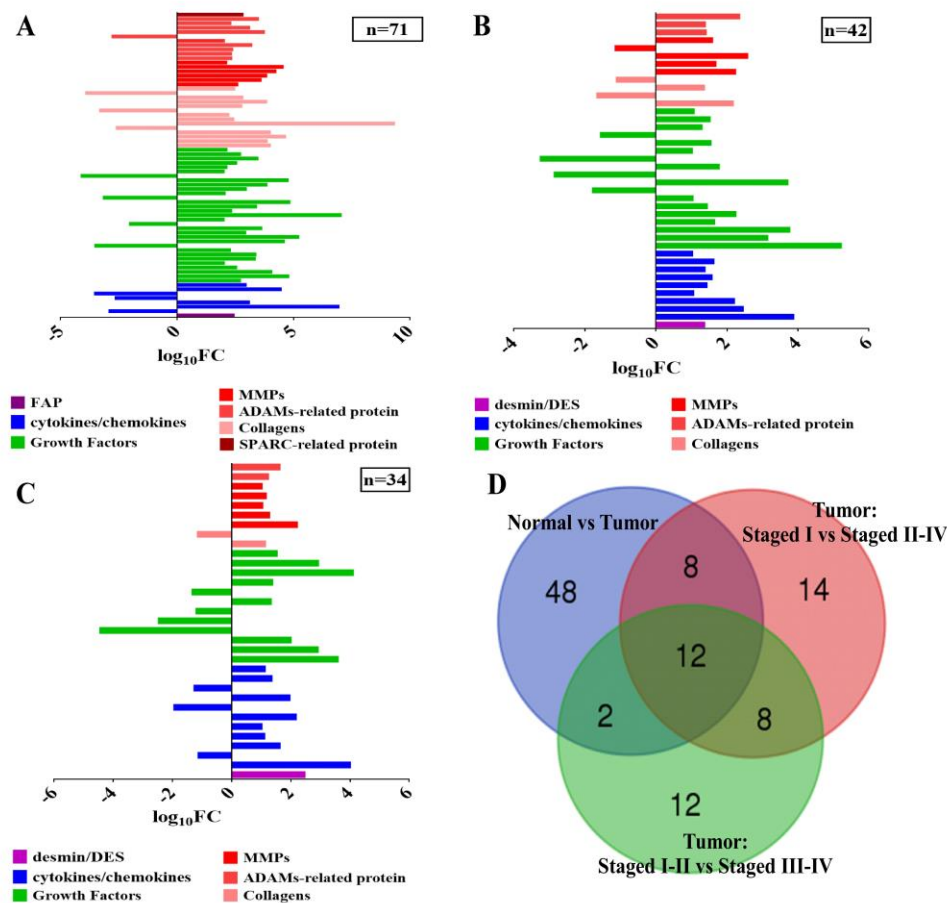

Note:

log10FC: the change of folds converted as the log10 form,

negative indicated downregulation and positive indicate

upregulation of these markers;

FAP, fibroblasts activation protein;

MMPs, matrix metalloproteinases;

ADAMs, ADAM metalloproteinase domains;

SPARC, secreted protein acidic and cysteine rich

**Figure S2**

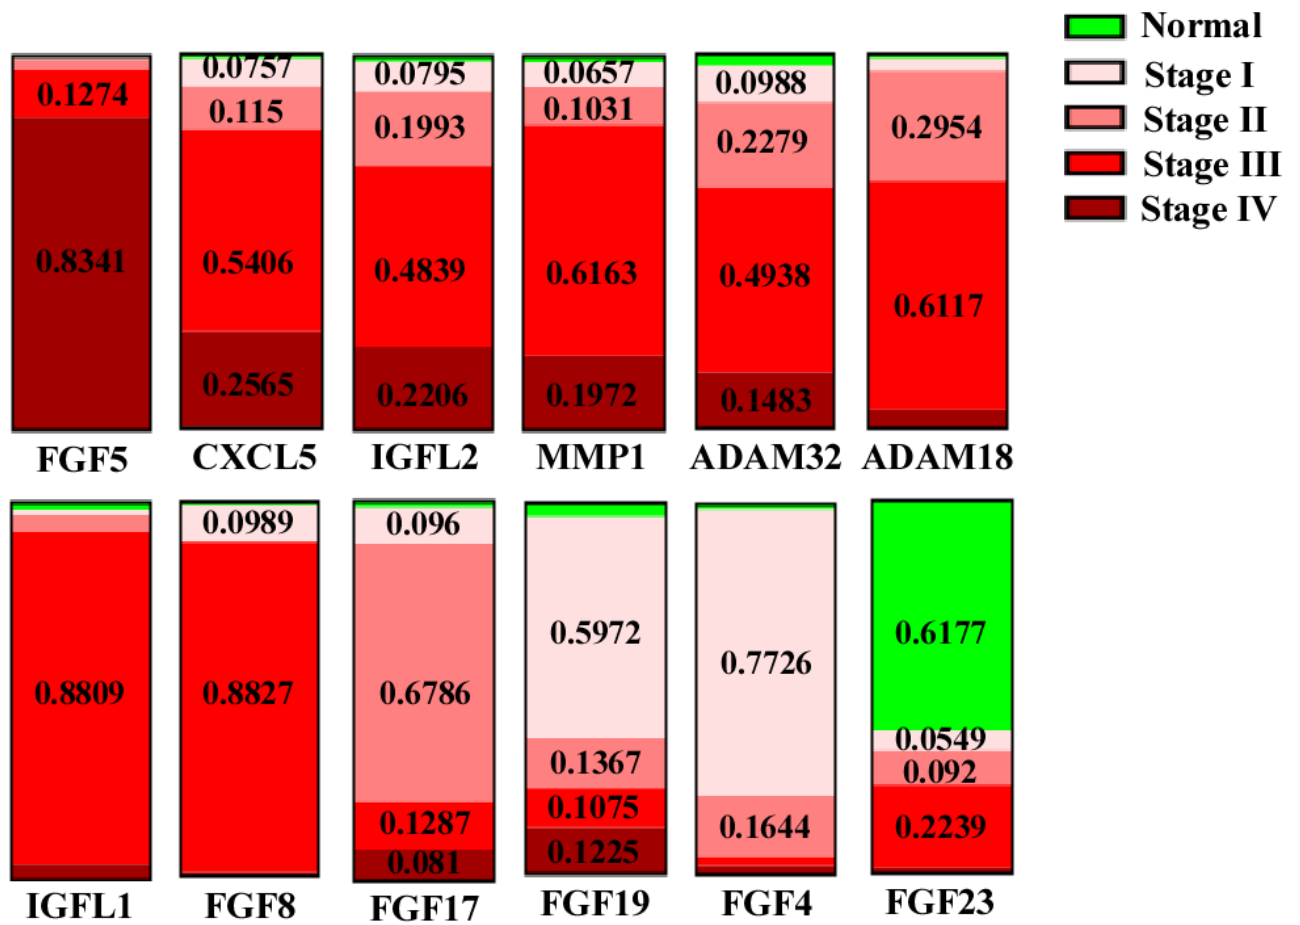

Figure S3

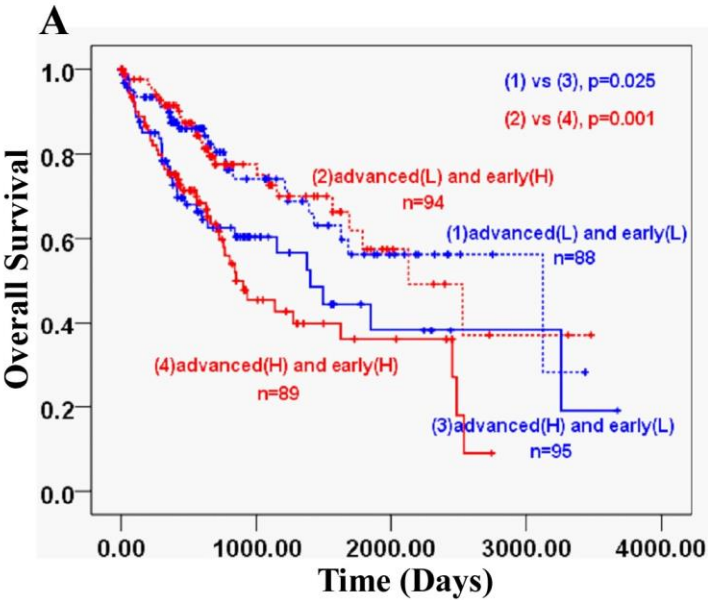

advanced: the 8-advanced panel  
early: the 3-early panel  
(L): low expression  
(H): high expression

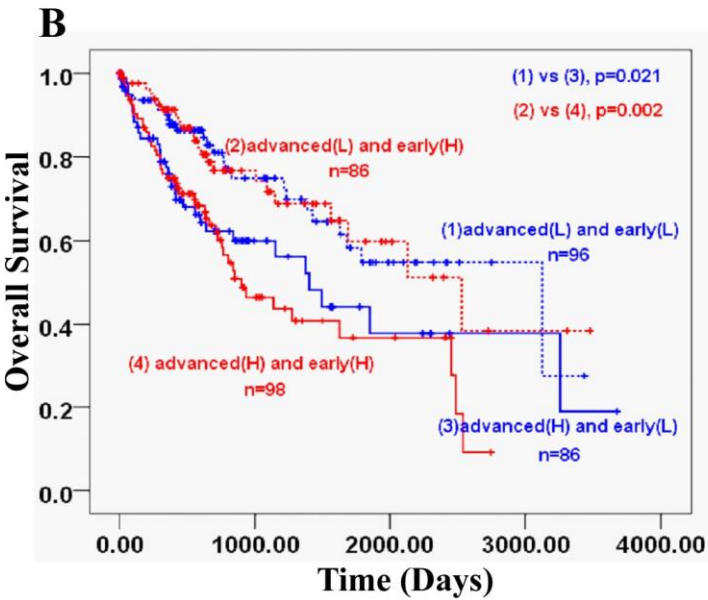

advanced: the 8-advanced panel  
early: the 4-early panel  
(L): low expression  
(H): high expression

**Figure S4**

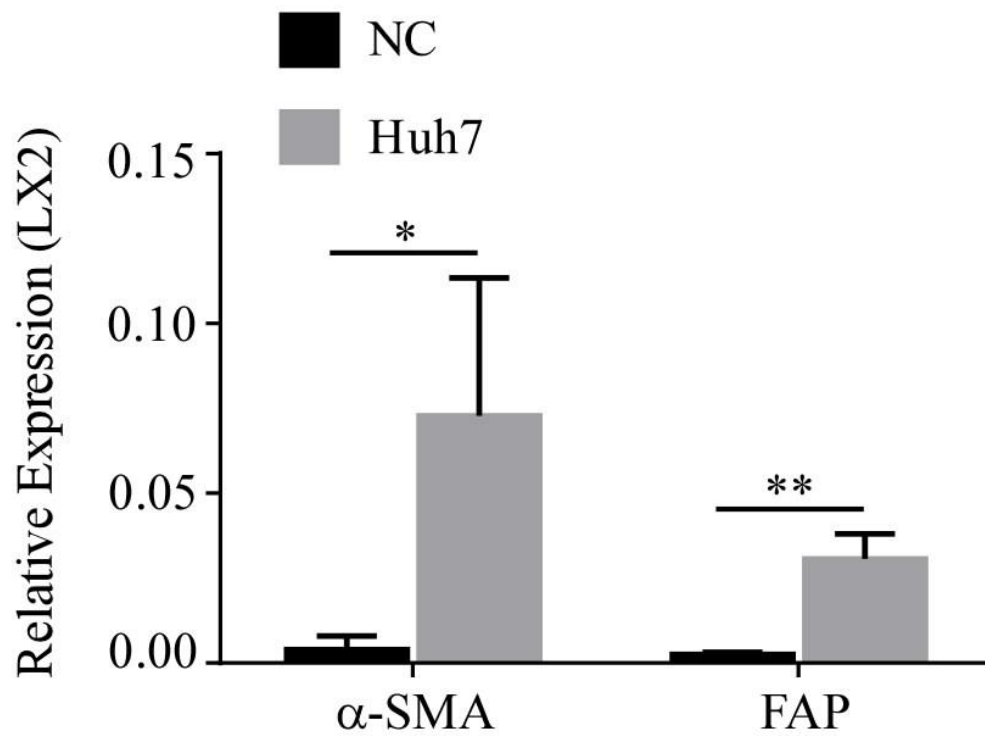

note: Huh7, LX2 activated by Huh7 conditioned cultured medium; NC, RPMI1640 treated LX2 as the negative control; \*,  $p < 0.01$ ; \*\*,  $p < 0.001$ .
